# Supplementary material for: A novel α-fetoprotein-derived helper T-lymphocyte epitope with strong immunogenicity in patients with hepatocellular carcinoma
Source: PubMed Central journal article supplement (PMC7055302; doi:10.1038/s41598-020-60843-4), 2020-03-04

Specific spots /  $3 \times 10^5$  PBMCs

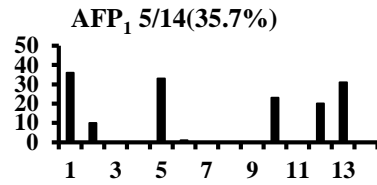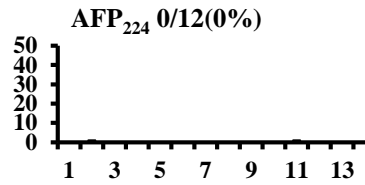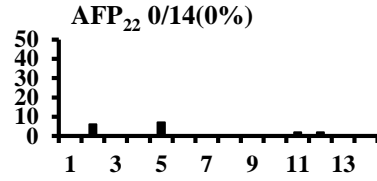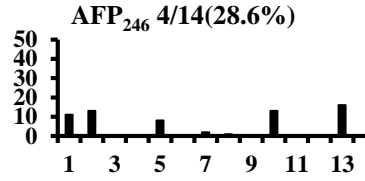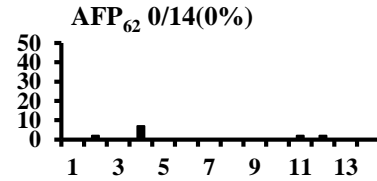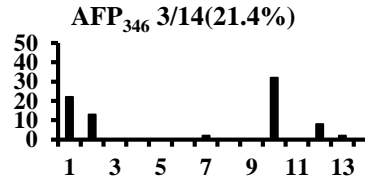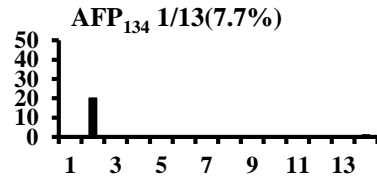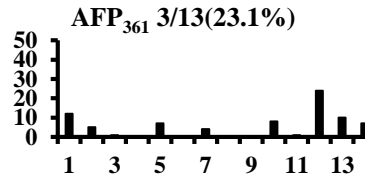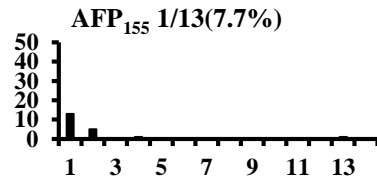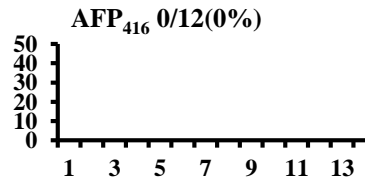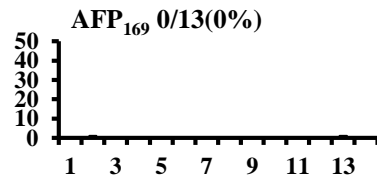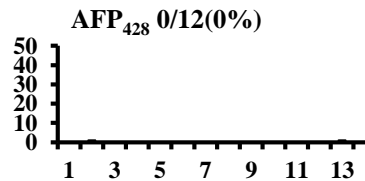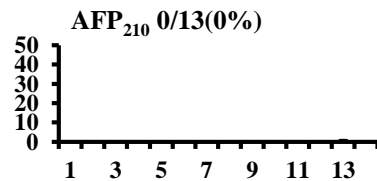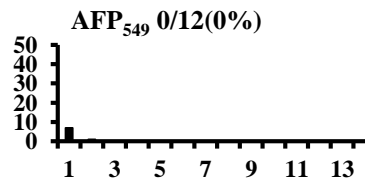

Healthy Donor

Patient 26

control

AFP<sub>1</sub>

AFP<sub>22</sub>

AFP<sub>346</sub>

PMA

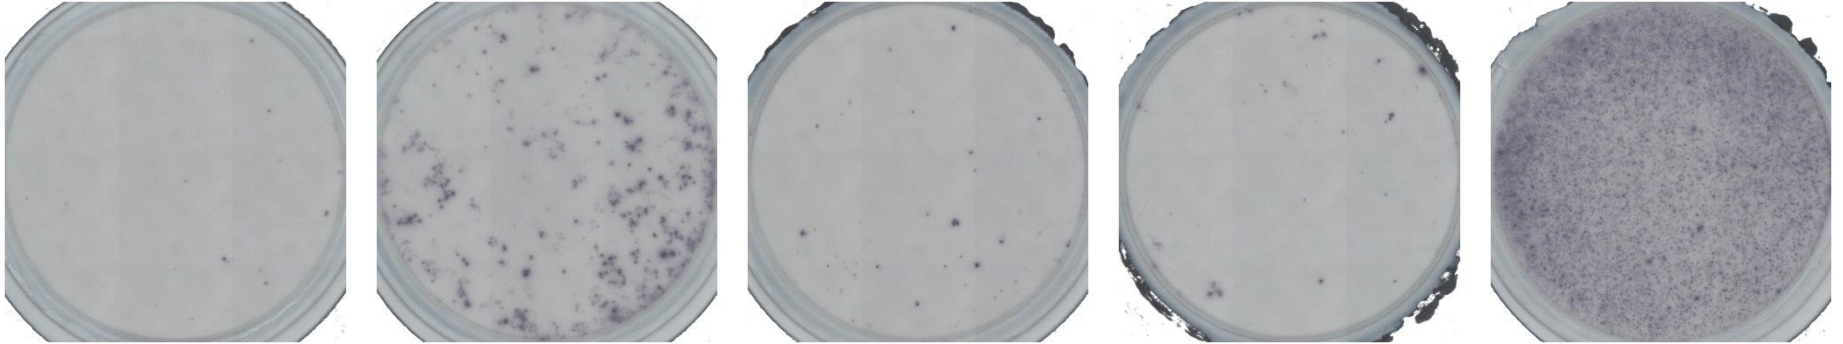

Healthy Donor 5

control

AFP<sub>1</sub>

AFP<sub>22</sub>

AFP<sub>346</sub>

PMA

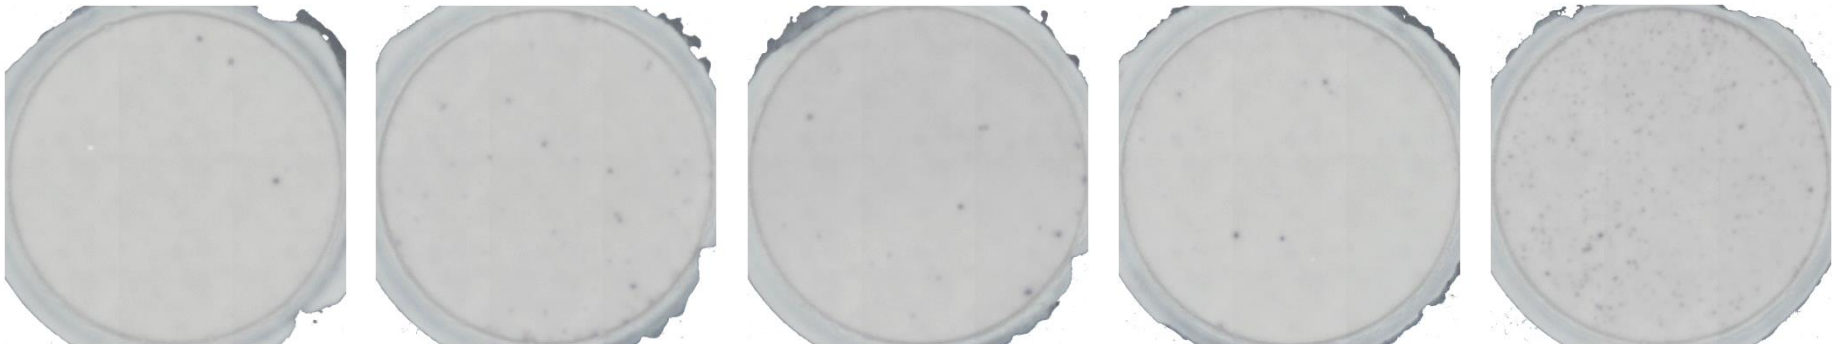

Patient 11

PBMCs

CD8 depleted

CD4 depleted

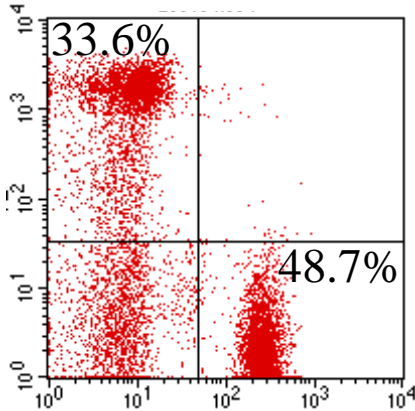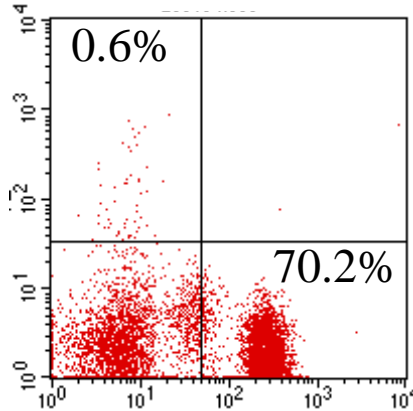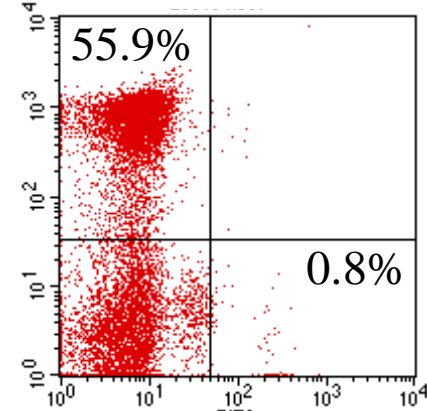

Patient 50

PBMCs

CD8 depleted

CD4 depleted

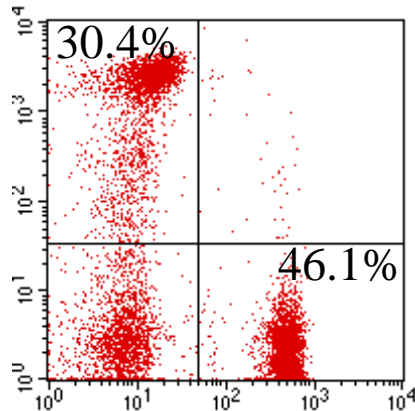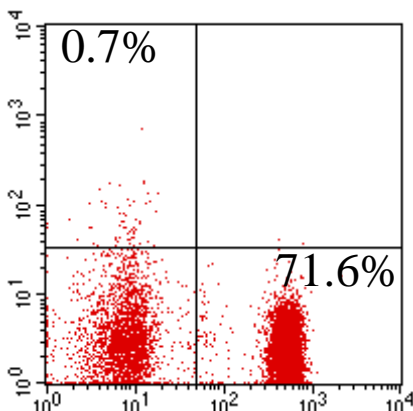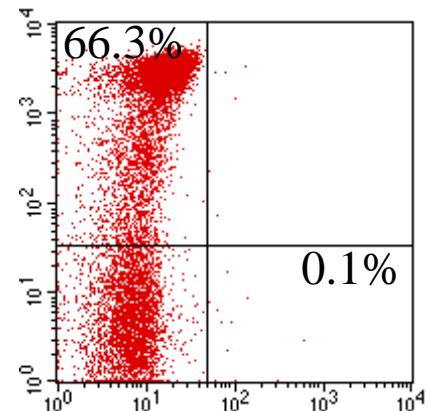

CD8

CD4

Patient 19

CD8 depleted  
control

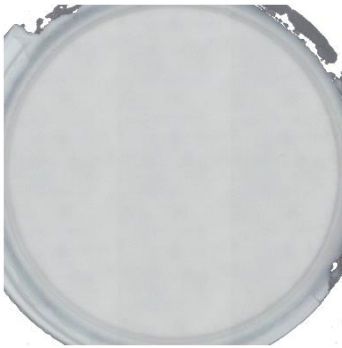

CD8 depleted  
AFP<sub>1</sub>

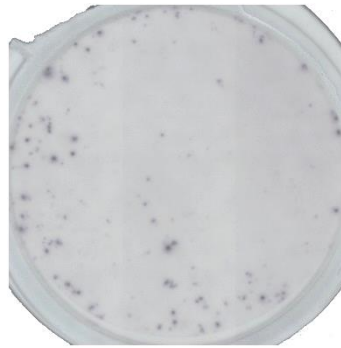

CD8 depleted  
AFP<sub>346</sub>

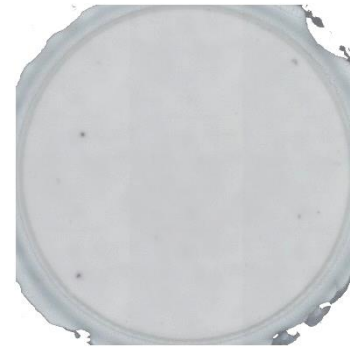

CD4 depleted  
control

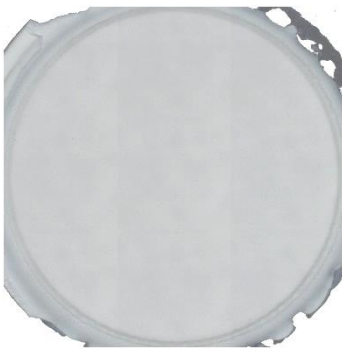

CD4 depleted  
AFP<sub>1</sub>

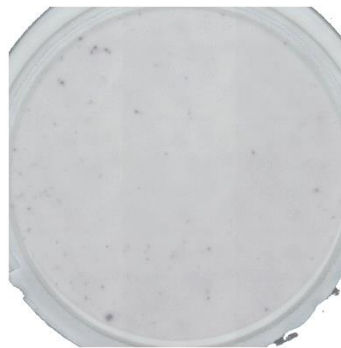

CD4 depleted  
AFP<sub>346</sub>

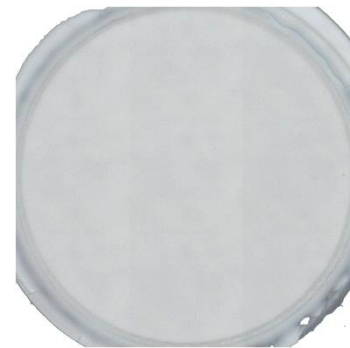

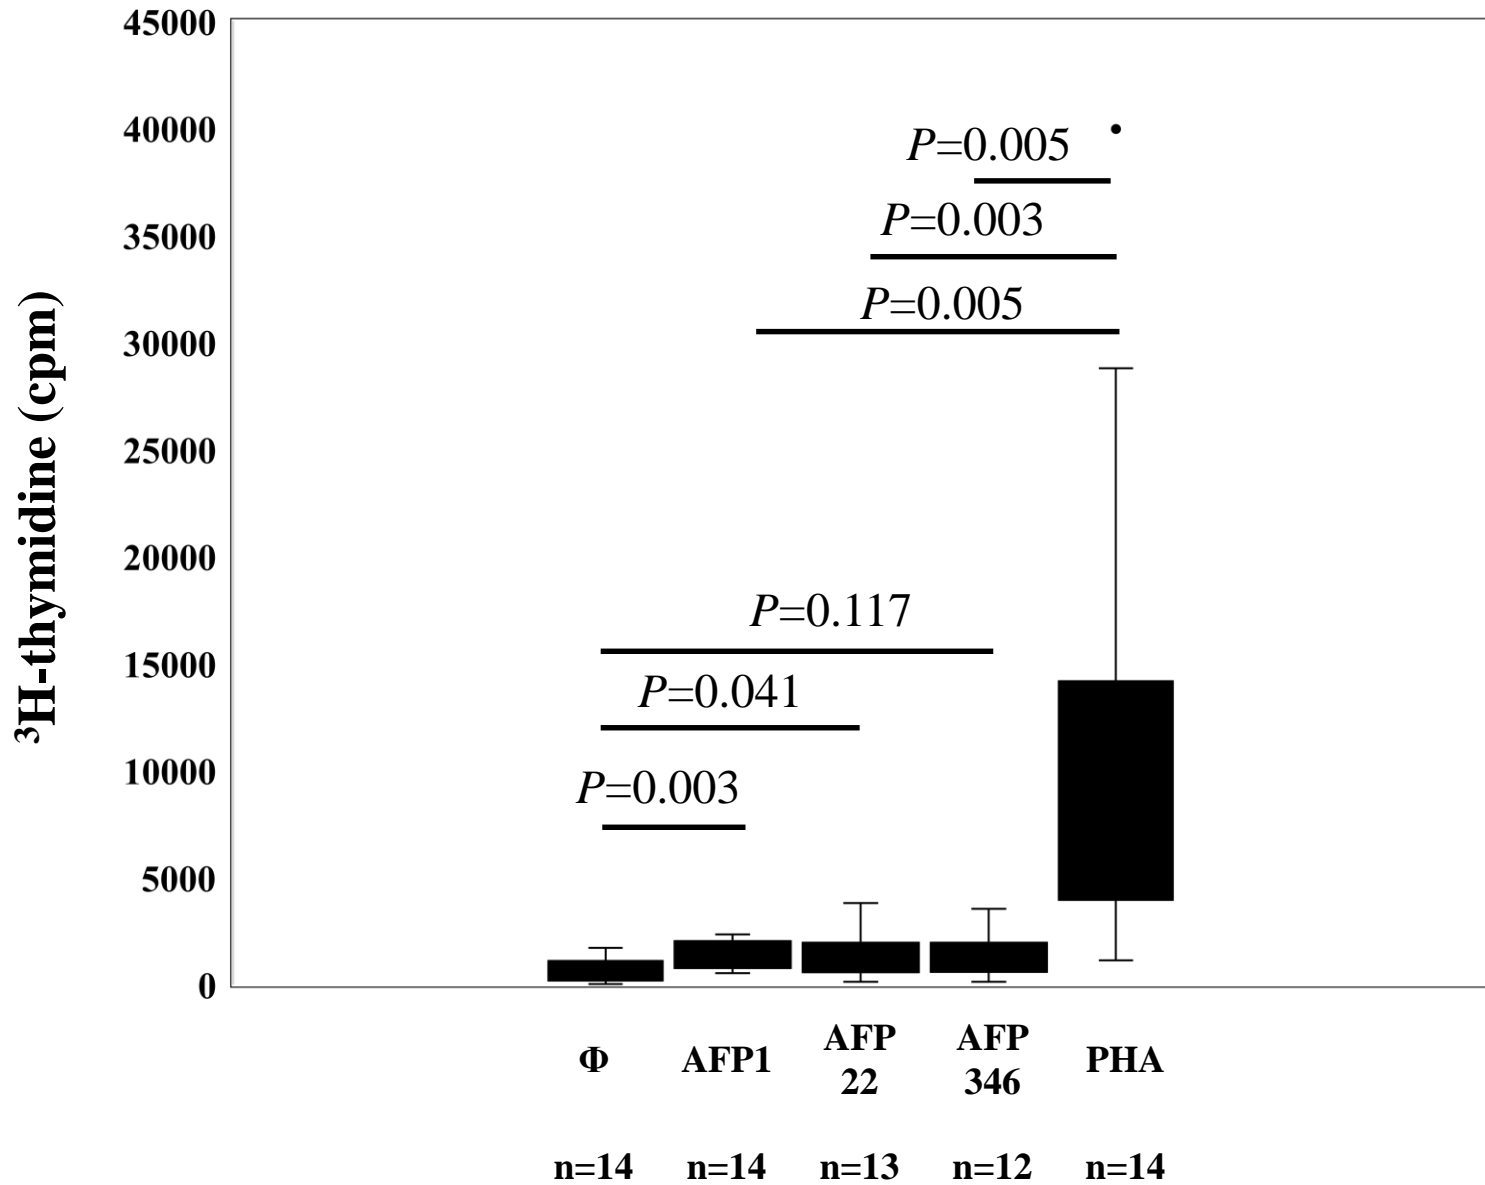

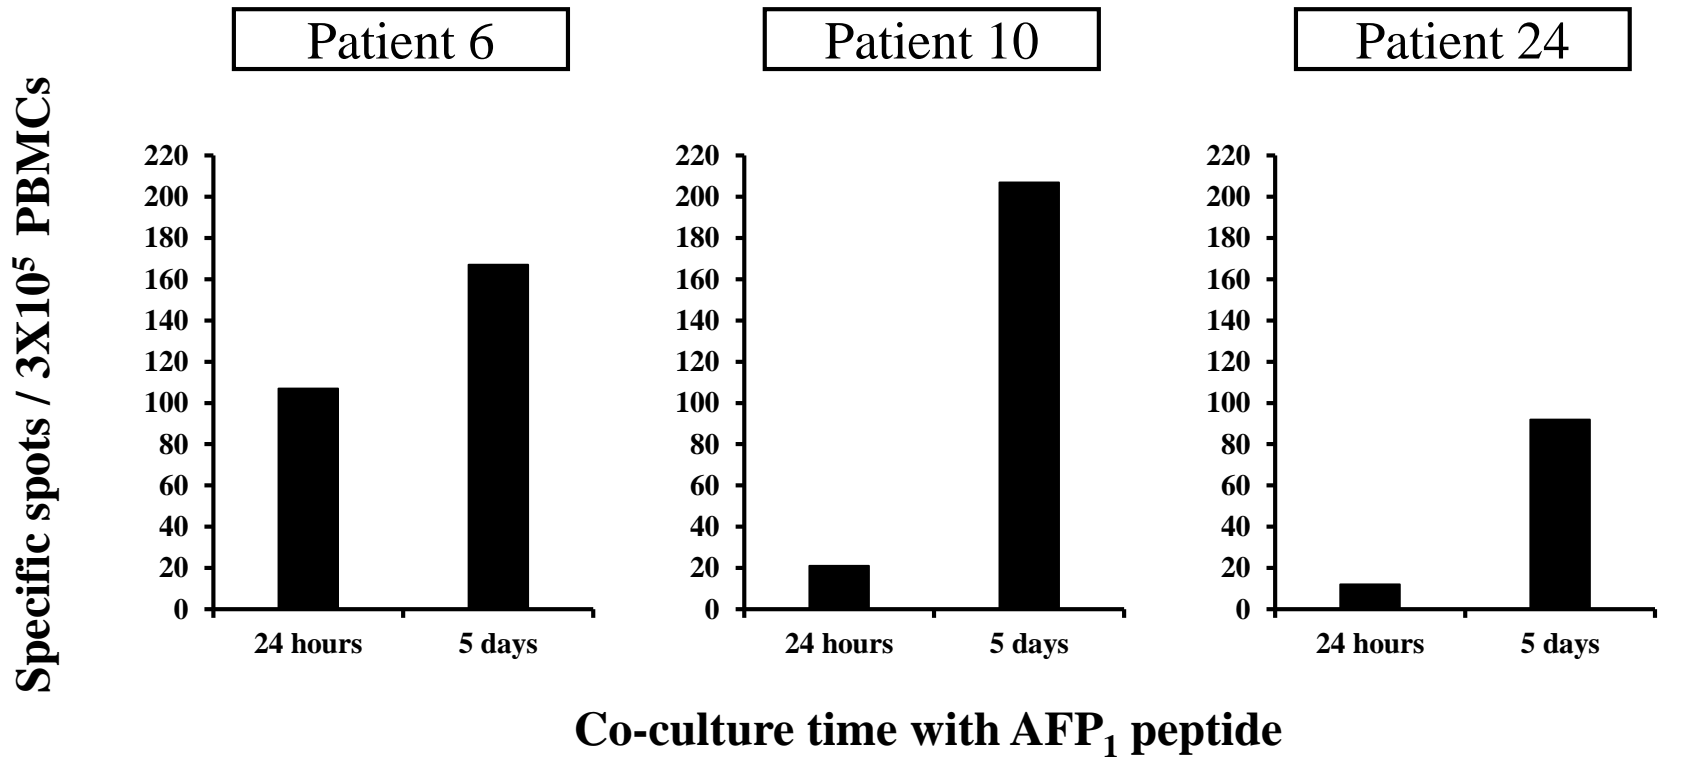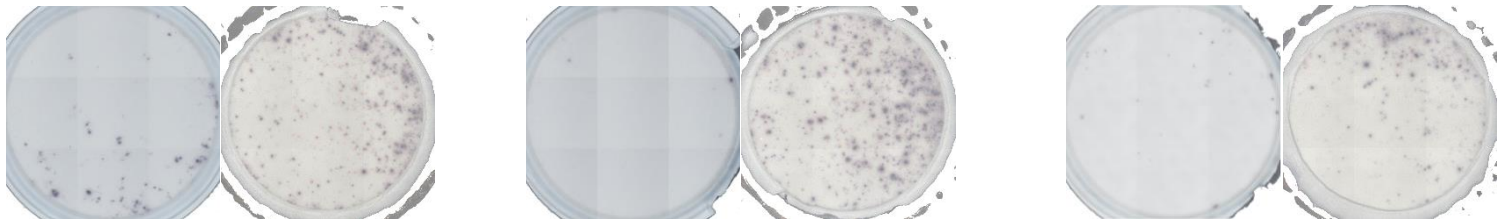

Patient 10

Pre-treatment

control

AFP<sub>1</sub>

AFP<sub>22</sub>

AFP<sub>346</sub>

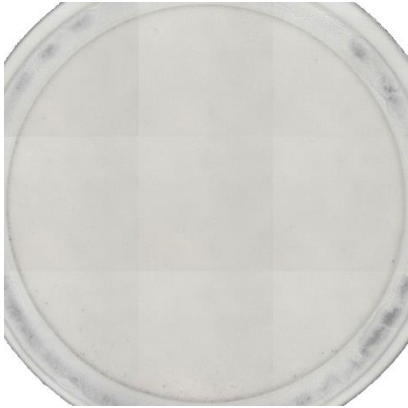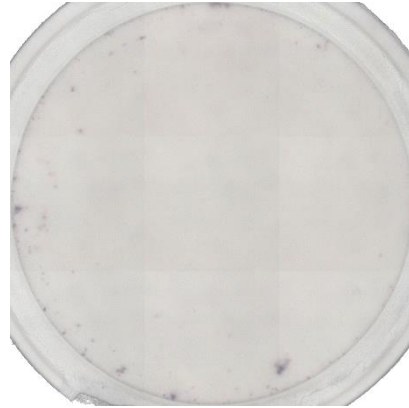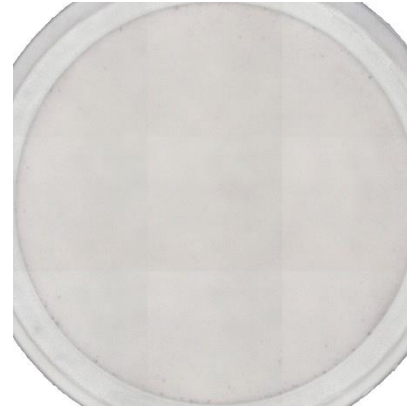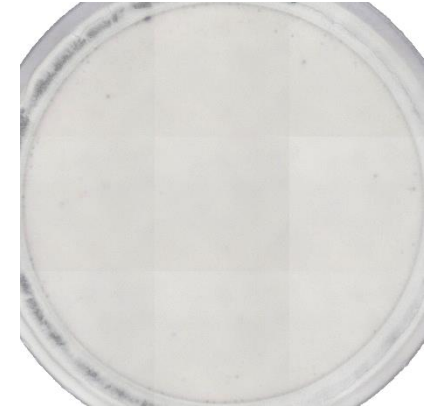

Post-treatment

control

AFP<sub>1</sub>

AFP<sub>22</sub>

AFP<sub>346</sub>

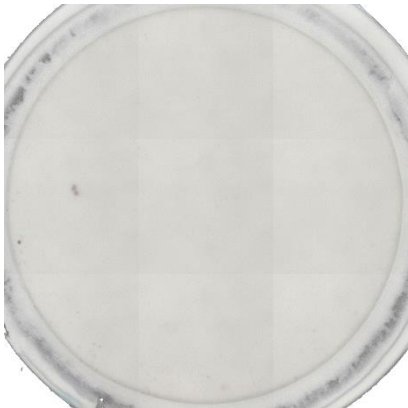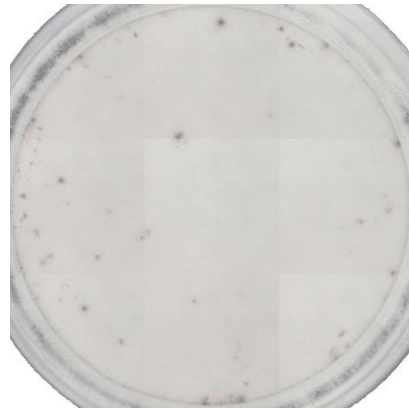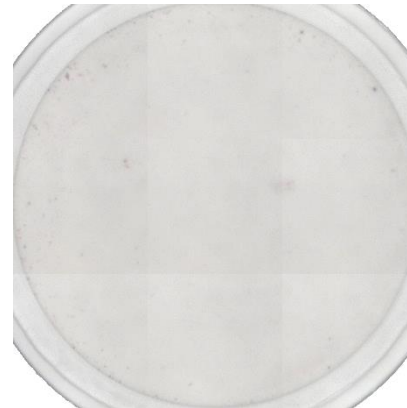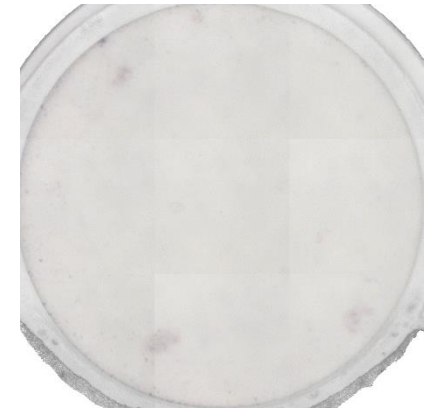

Supplement: 41598_2020_60843_MOESM1_ESM.pdf [file 41598_2020_60843_MOESM1_ESM.pdf]
